# Supplementary material for: An interpretable deep-learning model for early prediction of sepsis in the emergency department
Source: PubMed Central journal article supplement — Patterns (N Y). 2021 Jan 19;2(2):100196. doi: 10.1016/j.patter.2020.100196 (PMC7892361; doi:10.1016/j.patter.2020.100196), 2021-01-19
Supplement: mmc1.pdf [file mmc1.pdf]

**PATTER, Volume 2**

## **Supplemental Information**

### **An interpretable deep-learning model for early prediction of sepsis in the emergency department**

**Dongdong Zhang, Changchang Yin, Katherine M. Hunold, Xiaoqian Jiang, Jeffrey M. Caterino, and Ping Zhang**

## 1. Supplemental Figures

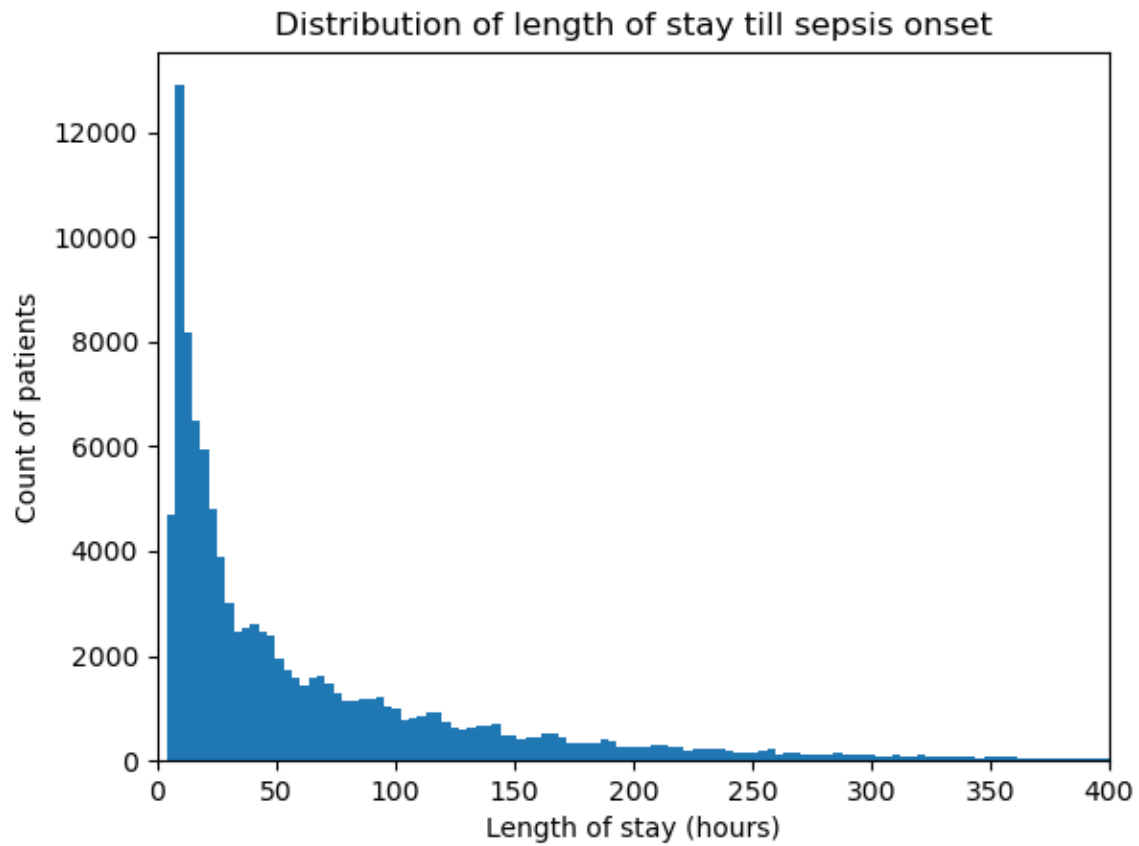

Figure S1. Distribution of length of stay from admission to sepsis onset on the dataset.

## 2. Supplemental Tables

**Table S1. Feature summarization and description of 2019 DII challenge dataset.**

| Feature                        | Unit    | Missing rate | Contribution rate | Description                                 |
|--------------------------------|---------|--------------|-------------------|---------------------------------------------|
| A/G Ratio                      | NULL    | 0.995        | 0                 | Albumin / Globulin Ratio                    |
| Albumin Quant                  | g/dL    | 0.983        | 0.001             | Albumin Quantitative, Serum                 |
| Alk Phos, Serum                | U/L     | 0.985        | 0.001             | Alkaline Phosphatase, Serum                 |
| ALT/SGPT                       | U/L     | 0.984        | 0.001             | Alanine Aminotransferase / SGPT             |
| Amylase, Serum                 | U/L     | 0.969        | 0.002             | Amylase, Serum Enzymatic Activity/Volume    |
| Anion Gap                      | mmol/L  | 0.969        | 0.001             | Anion Gap                                   |
| AST/SGOT                       | U/L     | 0.983        | 0.001             | Aspartate Aminotransferase / SGOT           |
| Base Excess                    | mmol/L  | 0.98         | 0.001             | Base Excess                                 |
| Baso %                         | %       | 0.97         | 0.001             | Basophils Percent                           |
| Baso Abs                       | 10*3/uL | 0.987        | 0.002             | Basophils Absolute Count                    |
| Baso Abs Cnt Bld               | 10*3/uL | 0.989        | 0.001             | Basophils Absolute Count Blood              |
| Bilirubin Direct, Serum        | mg/dL   | 0.997        | 0.002             | Bilirubin Direct Quantitative, Serum        |
| Bilirubin Serum Quant          | mg/dL   | 0.997        | 0.001             | Bilirubin Total Quantitative, Serum         |
| Bilirubin Total Bld mCnc       | mg/dL   | 0.988        | 0.001             | Bilirubin Total Serum or Plasma Mass/Volume |
| Blood Urea Nitrogen            | mg/dL   | 0.958        | 0.001             | Blood Urea Nitrogen                         |
| BMI                            | NULL    | 0.978        | 0.002             | BMI, Body Mass Index                        |
| BNP-B Type Natriuretic Peptide | pg/mL   | 0.999        | 0.002             | BNP-B Type Natriuretic Peptide              |
| Body Surface Area              | m2      | 0.988        | 0.004             | Body Surface Area                           |
| Braden Scale                   | NULL    | 0.917        | 0.024             | Braden Q Scale                              |
| BUN/Creat Ratio                | NULL    | 0.99         | 0.002             | Blood Urea Nitrogen Creatinine Ratio        |
| Calcium Ionized                | mmol/L  | 0.993        | 0.001             | Calcium Ionized                             |
| Calcium Quant                  | mg/dL   | 0.959        | 0.001             | Calcium Quantitative, Blood                 |
| Chol HDL                       | mg/dL   | 0.999        | 0.001             | HDL Cholesterol                             |
| Chol Total, Serum              | mg/dL   | 0.999        | 0.002             | Cholesterol Total, Serum                    |
| CK/CPK, Total, Serum           | U/L     | 0.997        | 0.005             | CK/CPK, Total, Serum                        |
| CKMB                           | ng/mL   | 0.998        | 0.001             | Creatine Kinase-MB                          |
| Cl, Serum                      | mmol/L  | 0.959        | 0.002             | Chloride, Serum                             |
| CO2                            | mmol/L  | 0.912        | 0.011             | Carbon dioxide                              |
| Creatinine, Serum Quant        | mg/dL   | 0.958        | 0.002             | Creatinine, Serum Quantitative              |
| DBP                            | mm[Hg]  | 0.278        | 0.164             | Blood Pressure Diastolic                    |
| Diff Bands                     | %       | 0.996        | 0.001             | Differential Bands                          |
| Diff Bands, Abs                | /uL     | 0.999        | 0                 | Diff Bands, Abs                             |
| Diff Blast                     | K/mm3   | 0.999        | 0                 | Differential Blast                          |
| Diff, Eosinophil %             | %       | 0.98         | 0.001             | Eosinophil Percent                          |
| Diff, Eosinophil Abs Quant Bld | 10*3/uL | 0.987        | 0.001             | Eosinophil Absolute Count Blood             |
| Diff, Eosinophil Count %       | %       | 0.989        | 0.007             | Diff, Eosinophil Count %                    |
| Diff, Eosinophil Count, Abs    | K/mm3   | 0.988        | 0.006             | Diff, Eosinophil Count, Abs                 |
| Diff, Granulocyte %            | %       | 0.994        | 0.004             | Granulocyte Percent                         |
| Diff Nucleated RBC             | %       | 0.994        | 0                 | Differential Nucleated Red Blood Cell (RBC) |
| ETCO2                          | mm[Hg]  | 0.963        | 0.004             | ETCO2 (End Tidal CO2)                       |

|                                          |                           |       |       |                                                                                                 |
|------------------------------------------|---------------------------|-------|-------|-------------------------------------------------------------------------------------------------|
| FiO2                                     | %                         | 0.917 | 0.054 | FiO2 (Fraction of Inspired Oxygen)                                                              |
| FLACC Pain Scale                         | NULL                      | 0.99  | 0.013 | FLACC Pain Scale (Face Legs Arms Cry Consolability Scale)                                       |
| GFR/BSA Pred Black SerPl MDRD ArVRat     | mL/min/1.73m <sup>2</sup> | 0.992 | 0.002 | Glomerular Filtration Rate/1.73 sq M Predicted Among Blacks Creatinine Based Formula (MDRD)     |
| GFR/BSA Pred non black SerPl MDRD ArVRat | mL/min                    | 0.994 | 0.002 | Glomerular Filtration Rate/1.73 sq M Predicted Among non-blacks Creatinine Based Formula (MDRD) |
| Glasgow Coma Score                       | NULL                      | 0.728 | 0.086 | Glasgow Coma Score                                                                              |
| Globulin, Serum                          | g/dL                      | 0.996 | 0     | Globulin, Serum                                                                                 |
| Glomerular Filtration Rate               | mL/min/1.73m <sup>2</sup> | 0.972 | 0.004 | Glomerular Filtration Rate                                                                      |
| Glucose, Serum Quant                     | mg/dL                     | 0.95  | 0.014 | Glucose, Serum/Plasma Quantitative                                                              |
| Glucose Stick/Meter WBlood POC           | mg/dL                     | 0.944 | 0.13  | Glucose Stick/Meter Whole Blood POC                                                             |
| HCO3                                     | mmol/L                    | 0.97  | 0.002 | HCO3                                                                                            |
| Hct                                      | %                         | 0.956 | 0.002 | Hematocrit                                                                                      |
| Height                                   | cm                        | 0.973 | 0.001 | Height                                                                                          |
| Hgb                                      | g/dL                      | 0.954 | 0.003 | Hemoglobin                                                                                      |
| Hgb A1C                                  | %                         | 0.999 | 0.003 | Hemoglobin A1C (Glycosylated Hemoglobin)                                                        |
| HR                                       | bpm                       | 0.288 | 0.206 | Heart Rate                                                                                      |
| Imm Granulocytes Cnt Bld Auto, %         | %                         | 0.998 | 0.004 | Imm Granulocytes Cnt Bld Auto, %                                                                |
| Imm Granulocytes Cnt Bld Auto, Abs       | 10 <sup>3</sup> /uL       | 0.998 | 0.001 | Imm Granulocytes Cnt Bld Auto, Abs                                                              |
| INR Platelet Poor Plasma                 | NULL                      | 0.997 | 0.001 | INR Platelet Poor Plasma                                                                        |
| International Normalized Ratio           | NULL                      | 0.988 | 0.004 | International Normalized Ratio                                                                  |
| Iron, Serum                              | ug/dL                     | 0.999 | 0.004 | Iron, Serum                                                                                     |
| Lactic Acid Blood                        | mmol/L                    | 0.994 | 0.002 | Blood Gas Lactic Acid Blood                                                                     |
| Lactic Dehydrogenase                     | U/L                       | 0.999 | 0.008 | Lactic Dehydrogenase                                                                            |
| Lipase, Serum                            | U/L                       | 0.998 | 0.001 | Lipase, Serum                                                                                   |
| Lymph %                                  | %                         | 0.968 | 0.002 | Lymphocyte Percent                                                                              |
| Lymph Abs Cnt                            | 10 <sup>3</sup> /uL       | 0.969 | 0.002 | Lymphocyte Absolute Count                                                                       |
| Magnesium, Serum/Plasma                  | mg/dL                     | 0.977 | 0.002 | Magnesium, Serum/Plasma                                                                         |
| MAP                                      | mm[Hg]                    | 0.511 | 0.135 | Mean airway pressure (MAP)                                                                      |
| MCH Concentration                        | g/dL                      | 0.96  | 0.002 | MCH Concentration                                                                               |
| Mean Corpuscular Hemoglobin              | pg                        | 0.96  | 0.001 | Mean Corpuscular Hemoglobin                                                                     |
| Mean Corpuscular Volume                  | fL                        | 0.96  | 0.002 | Mean Corpuscular Volume                                                                         |
| Mean Platelet Volume                     | fL                        | 0.964 | 0.002 | Mean Platelet Volume                                                                            |
| Mono %                                   | %                         | 0.966 | 0.003 | Monocyte Percent                                                                                |
| Mono Abs Cnt Bld                         | 10 <sup>3</sup> /uL       | 0.97  | 0.001 | Monocyte Absolute Count Blood                                                                   |
| Neutrophil %                             | %                         | 0.974 | 0.001 | Neutrophil Percent                                                                              |
| Neutrophil Abs Bld Cnt                   | 10 <sup>3</sup> /uL       | 0.974 | 0     | Neutrophil Absolute Count Blood                                                                 |
| Pain Score                               | NULL                      | 0.841 | 0.133 | Pain Scale Score                                                                                |
| PCO2                                     | mm[Hg]                    | 0.964 | 0.006 | Partial Pressure Carbon Dioxide (PCO2)                                                          |
| Peak inspiratory pressure                | cmH20                     | 0.959 | 0.002 | Peak inspiratory pressure                                                                       |
| Peep                                     | cmH20                     | 0.939 | 0.002 | Peep (Positive End Expiratory Pressure)                                                         |

|                                   |                     |       |       |                                             |
|-----------------------------------|---------------------|-------|-------|---------------------------------------------|
| pH, Arterial                      | pH units            | 0.971 | 0.001 | pH, Arterial                                |
| Phosphorus, Serum                 | mg/dL               | 0.982 | 0.002 | Phosphorus, Serum                           |
| pH, Urine                         | pH units            | 0.998 | 0.003 | pH, Urine                                   |
| Platelet Count                    | 10 <sup>3</sup> /uL | 0.961 | 0     | Platelet Count                              |
| PO2                               | mm[Hg]              | 0.968 | 0.002 | Partial Pressure of Oxygen (PO2)            |
| Potassium, Serum                  | mmol/L              | 0.955 | 0.002 | Potassium, Serum                            |
| Protein Total, Serum              | g/dL                | 0.985 | 0.001 | Protein Total, Serum                        |
| PT                                | s                   | 0.985 | 0.002 | Prothrombin Time                            |
| PTT                               | s                   | 0.99  | 0.008 | Partial Thromboplastin Time                 |
| PTT/APTT PPP                      | s                   | 0.997 | 0.004 | PTT/APTT, Platelet Poor Coagulation Assay   |
| Pulse                             | bpm                 | 0.796 | 0.084 | Pulse                                       |
| Pulse Oximetry                    | %                   | 0.982 | 0.011 | Pulse Oximetry                              |
| QRS Duration                      | s                   | 0.984 | 0.013 | QRS Duration                                |
| QT Interval                       | s                   | 0.982 | 0.038 | QT Interval                                 |
| RBC                               | 10 <sup>6</sup> /uL | 0.961 | 0.001 | Red Blood Cell Count                        |
| Red Blood Cell Distribution Width | %                   | 0.966 | 0.001 | Red Blood Cell Distribution Width           |
| Resp Rt                           | Br/min              | 0.22  | 0.158 | Respiratory Rate                            |
| SBP                               | mm[Hg]              | 0.335 | 0.117 | Blood Pressure Systolic                     |
| SO2                               | %                   | 0.58  | 0.07  | O2 Saturation (SO2)                         |
| Sodium, Serum                     | mmol/L              | 0.958 | 0.001 | Sodium, Serum                               |
| Specific Gravity Urine            | NULL                | 0.998 | 0.002 | Specific Gravity, Urine                     |
| TCO2                              | mmol/L              | 0.991 | 0.015 | Carbon dioxide Total (TCO2)                 |
| Temp                              | Cel                 | 0.668 | 0.143 | Temperature (Route Not Specified)           |
| Thyroid Stimulating Hormone       | u[iU]/mL            | 0.998 | 0.003 | Thyroid Stimulating Hormone                 |
| Tidal Volume                      | mL                  | 0.956 | 0.004 | Tidal Volume                                |
| Triglyceride, Serum               | mg/dL               | 0.998 | 0.001 | Triglyceride, Serum                         |
| Troponin I                        | ng/mL               | 0.997 | 0.002 | Troponin I                                  |
| Troponin T S/Pl                   | ng/mL               | 0.999 | 0.001 | Troponin T, Serum/Plasma                    |
| UA Red Blood Cell                 | [HPF]               | 0.999 | 0.005 | UA Red Blood Cell                           |
| UA Urobilinogen                   | mg/dL               | 0.999 | 0.003 | UA Urobilinogen                             |
| UA WBC                            | [HPF]               | 0.998 | 0.002 | UA White Blood Cell                         |
| Vitamin B12, Serum                | pg/mL               | 0.999 | 0.003 | Vitamin B12, Serum Quantitative (Cobalamin) |
| WBC                               | 10 <sup>3</sup> /uL | 0.96  | 0.001 | White Blood Cell Count                      |
| Weight                            | kg                  | 0.964 | 0.008 | Weight                                      |

**Table S2. P-value matrix of model performance (AUC) across various subpopulations on Case1 sepsis prediction.**

|           |                  | Gender |       | Race             |       |           |                 | Age group |       |       |       |       |       |       |       |
|-----------|------------------|--------|-------|------------------|-------|-----------|-----------------|-----------|-------|-------|-------|-------|-------|-------|-------|
|           |                  | Female | Male  | African American | Asian | Caucasian | Others/ unknown | 20~30     | 30~40 | 40~50 | 50~60 | 60~70 | 70~80 | <20   | >=80  |
| Gender    | Female           | 1      | 0.025 | 0.33             | 0.22  | 0.02      | 0.012           | 0.046     | 0.007 | 0.64  | 0.123 | 0.323 | 0.011 | 0.013 | 0.856 |
|           | Male             | 0.025  | 1     | 0.01             | 0.478 | 0.747     | 0.165           | 0.314     | 0.081 | 0.005 | 0.582 | 0.624 | 0.112 | 0.002 | 0.075 |
| Race      | African American | 0.33   | 0.01  | 1                | 0.138 | 0.008     | 0.005           | 0.019     | 0.004 | 0.501 | 0.037 | 0.118 | 0.005 | 0.046 | 0.299 |
|           | Asian            | 0.22   | 0.478 | 0.138            | 1     | 0.504     | 0.724           | 0.775     | 0.831 | 0.182 | 0.417 | 0.405 | 0.849 | 0.027 | 0.244 |
|           | Caucasian        | 0.02   | 0.747 | 0.008            | 0.504 | 1         | 0.221           | 0.366     | 0.109 | 0.004 | 0.464 | 0.546 | 0.143 | 0.002 | 0.06  |
|           | Others/ unknown  | 0.012  | 0.165 | 0.005            | 0.724 | 0.221     | 1               | 0.902     | 0.67  | 0.004 | 0.135 | 0.217 | 0.657 | 0.001 | 0.026 |
| Age group | 20~30            | 0.046  | 0.314 | 0.019            | 0.775 | 0.366     | 0.902           | 1         | 0.85  | 0.025 | 0.24  | 0.274 | 0.824 | 0.003 | 0.068 |
|           | 30~40            | 0.007  | 0.081 | 0.004            | 0.831 | 0.109     | 0.67            | 0.85      | 1     | 0.003 | 0.074 | 0.137 | 0.956 | 0.001 | 0.016 |
|           | 40~50            | 0.64   | 0.005 | 0.501            | 0.182 | 0.004     | 0.004           | 0.025     | 0.003 | 1     | 0.044 | 0.192 | 0.005 | 0.017 | 0.552 |
|           | 50~60            | 0.123  | 0.582 | 0.037            | 0.417 | 0.464     | 0.135           | 0.24      | 0.074 | 0.044 | 1     | 0.885 | 0.093 | 0.003 | 0.221 |
|           | 60~70            | 0.323  | 0.624 | 0.118            | 0.405 | 0.546     | 0.217           | 0.274     | 0.137 | 0.192 | 0.885 | 1     | 0.148 | 0.008 | 0.423 |
|           | 70~80            | 0.011  | 0.112 | 0.005            | 0.849 | 0.143     | 0.657           | 0.824     | 0.956 | 0.005 | 0.093 | 0.148 | 1     | 0.001 | 0.022 |
|           | <20              | 0.013  | 0.002 | 0.046            | 0.027 | 0.002     | 0.001           | 0.003     | 0.001 | 0.017 | 0.003 | 0.008 | 0.001 | 1     | 0.014 |
|           | >=80             | 0.856  | 0.075 | 0.299            | 0.244 | 0.06      | 0.026           | 0.068     | 0.016 | 0.552 | 0.221 | 0.423 | 0.022 | 0.014 | 1     |
